# Supplementary material for: Mediating Effect of Heat Waves between Ecosystem Services and Heat-Related Mortality of Characteristic Populations: Evidence from Jiangsu Province, China
Source: MDPI journal article supplement (doi:10.3390/ijerph20032750), 2023-02-03
Supplement: s1 [file s1]

## Supplementary materials

Title: Mediating effect of heat wave between ecosystem services and heat-related mortality of characteristic populations

### Table of Contents

**Figure S1.** Ecosystem services of Jiangsu Province.

**Figure S2.** Spatial-temporal patterns of HWMI.

**Figure S3.** Mortality relative risk caused by heat from 2007 to 2015

**Table S1.** Estimated effects of heat (95% confidence interval) on cause-specific mortality during 2007 to 2015 in 3 cities.

**Table S2.** Estimated effects of heat (95% confidence interval) on cardiorespiratory mortality during 2007 to 2015 in different sexes and age-groups in 3 cities.

**Table S3.** The minimum mortality temperature (MMT) stratified by cause of death.

**Table S4.** The minimum mortality temperature (MMT) of cardiorespiratory diseases stratified by sex and age.

**Table S5.** Sensitivity analysis for the RR of cause-specific mortality caused by extreme heat in three cities.

**Table S6.** Sensitivity analysis for the RR of cardiorespiratory mortality in different sexes and age-groups caused by extreme heat in three cities.

**Table S7.** Ecosystem services values of Jiangsu Province, Nanjing, Suzhou and

Yancheng.

**Table S8.** Correlation between ESs and HWMI.

**Table S9.** Correlation between ESs and cause-specific mortality risk associated with heat.

**Table S10.** Correlation between ESs and cardiorespiratory mortality risk in different groups associated with heat

**Table S11.** Results of paths and effects for different cause-special mortality risk.

**Table S12.** Results of paths and effects for different sexes and age-groups mortality risk.

**Table S13.** Results of Granger causality test between ESs and HWMI.

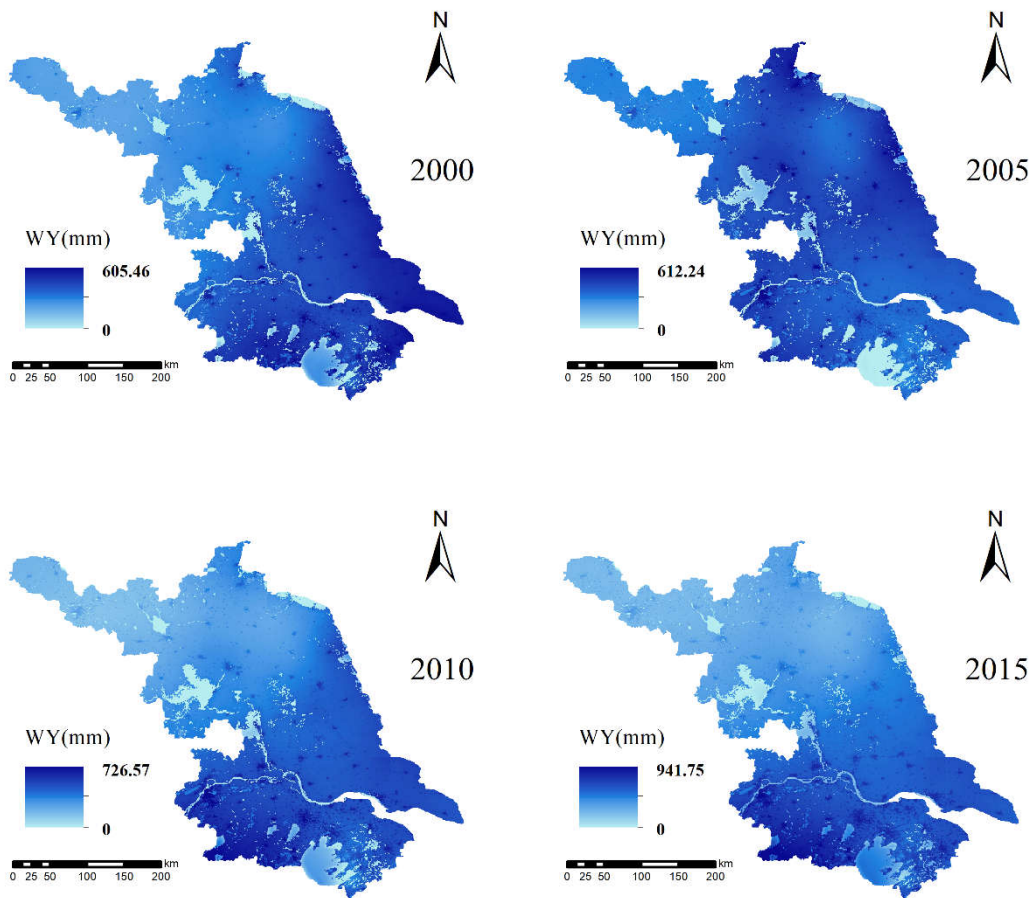

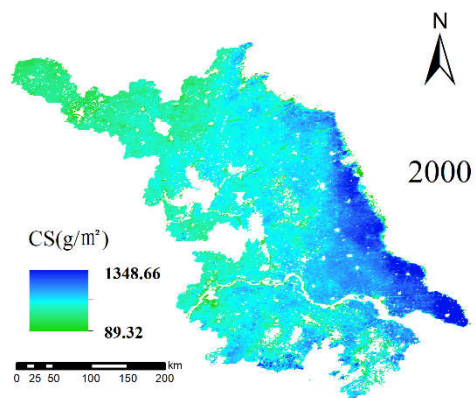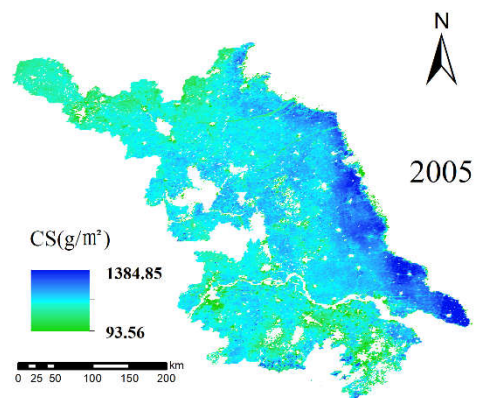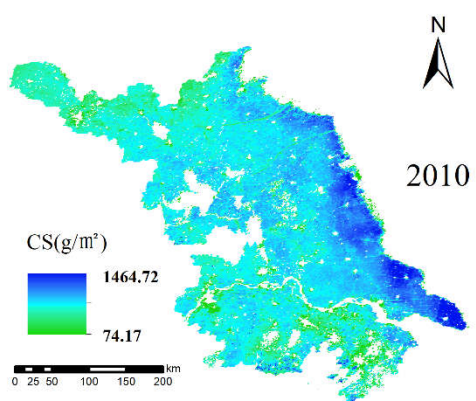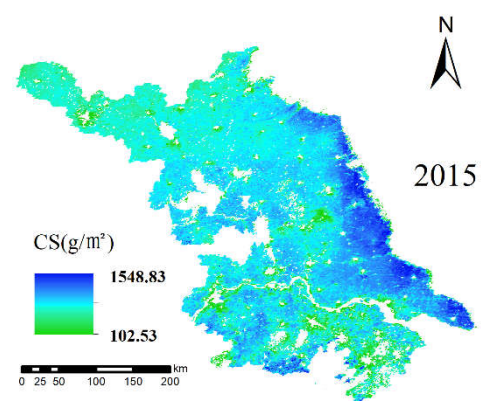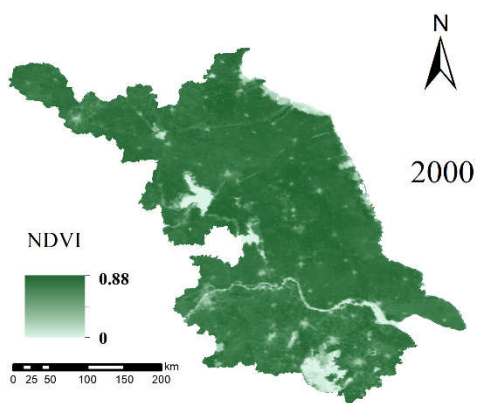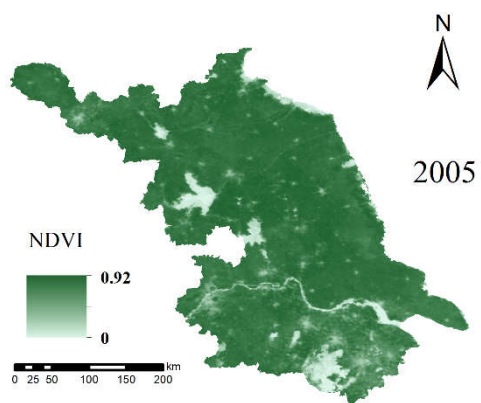

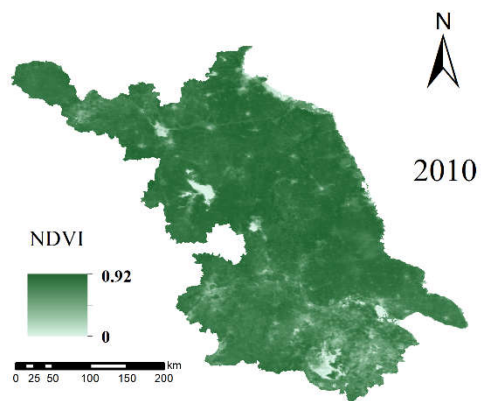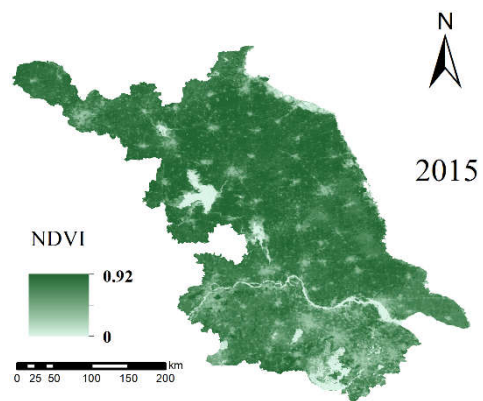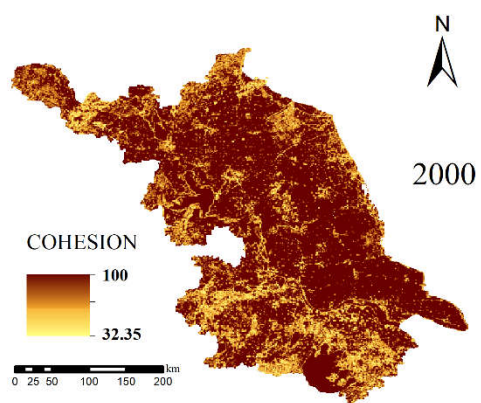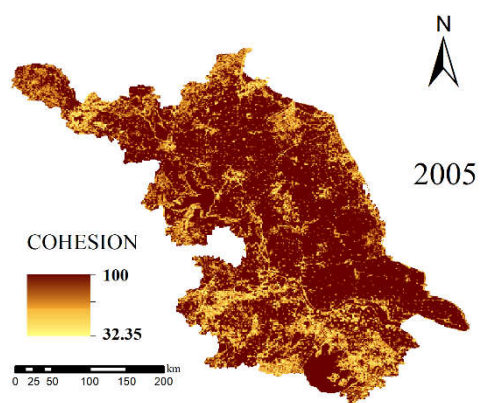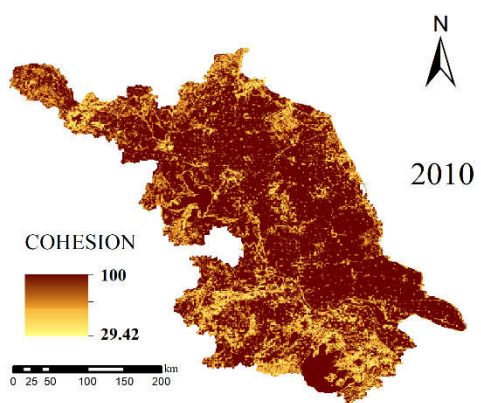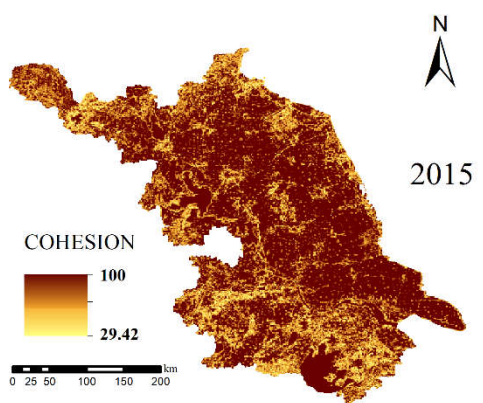



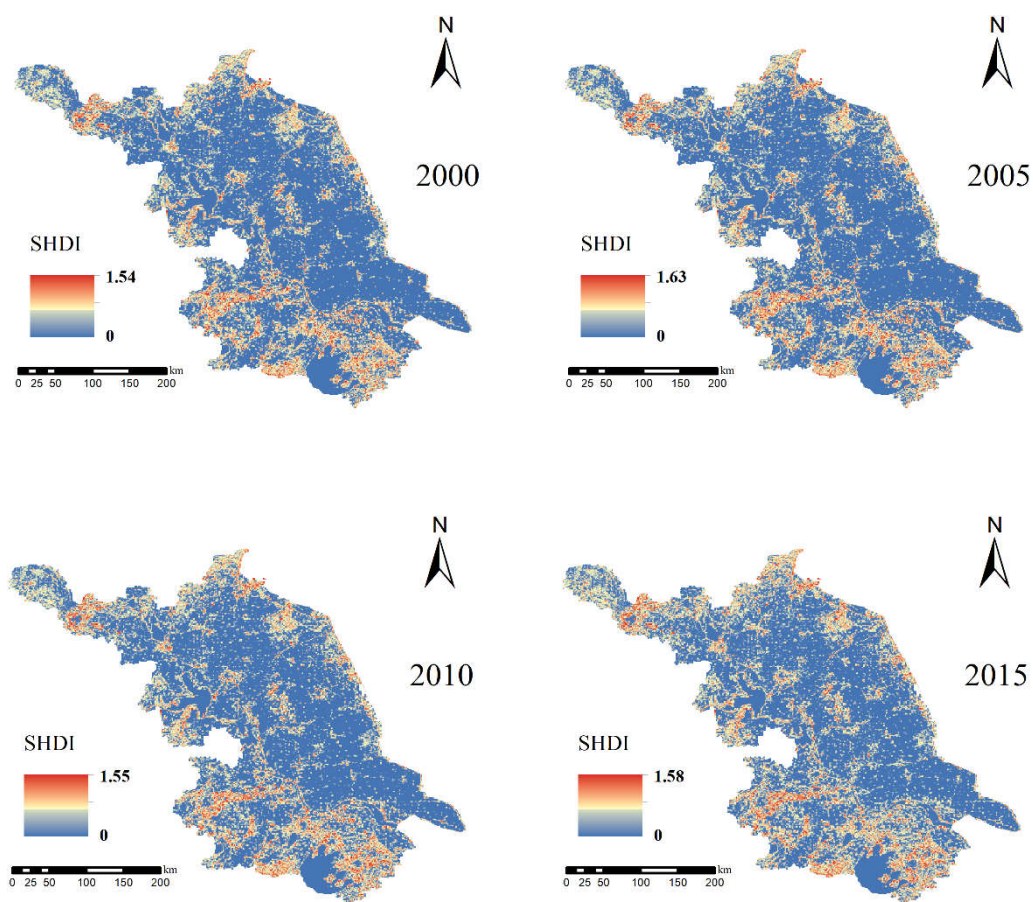

**Figure S1.** Ecosystem services of Jiangsu Province.

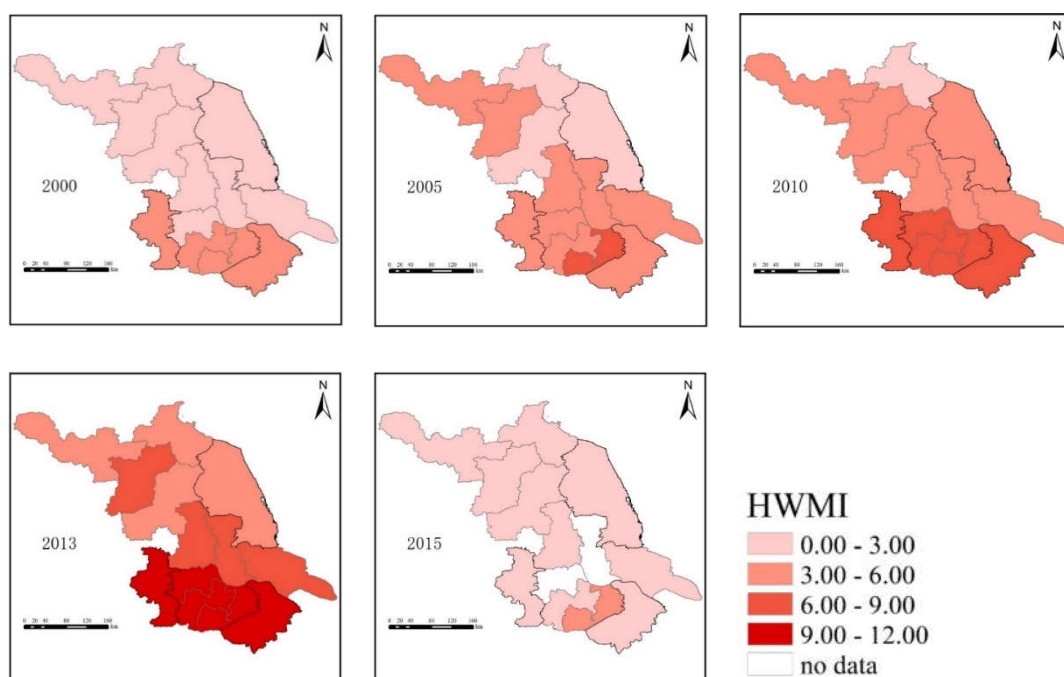

**Figure S2.** Spatial-temporal patterns of HWMI.

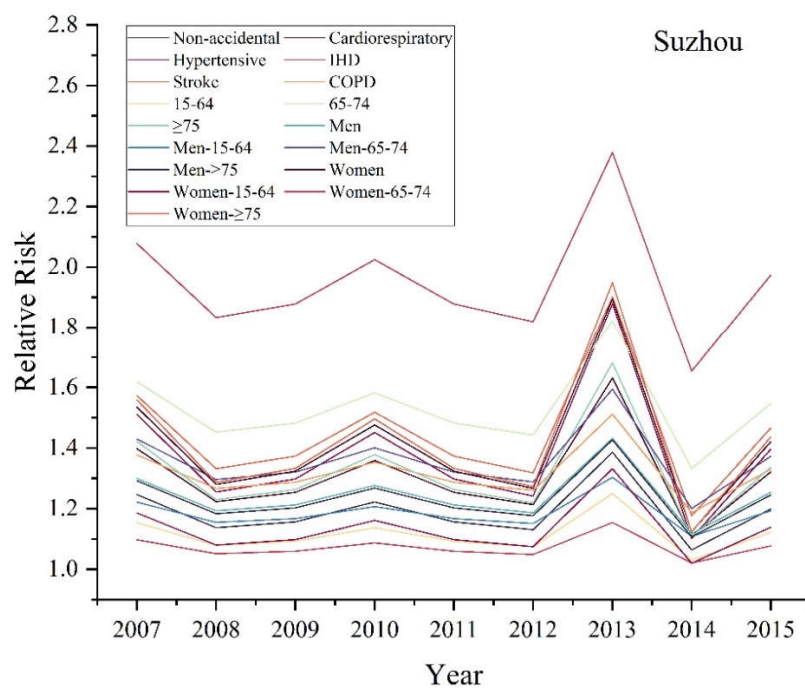

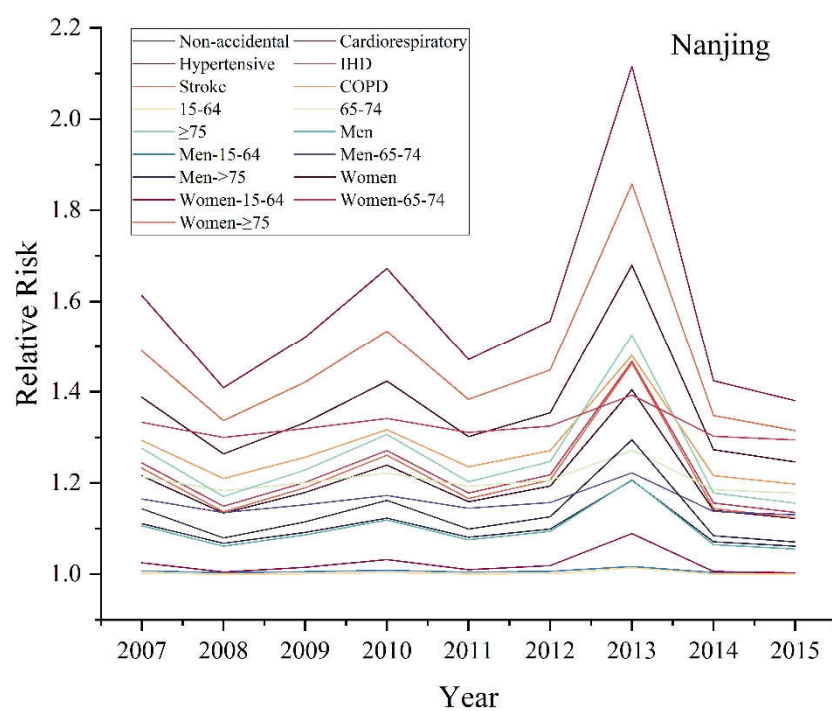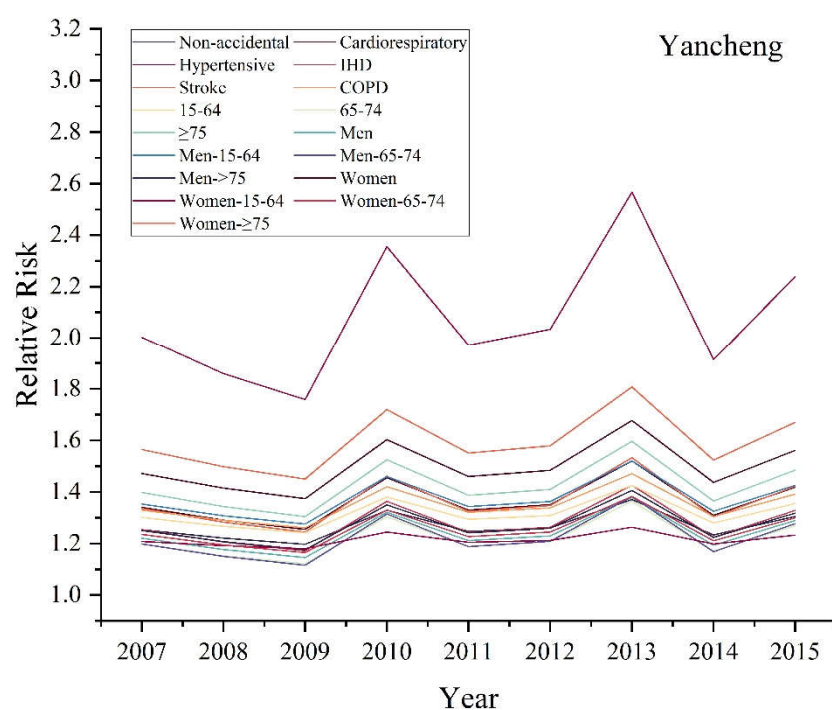

**Figure S3.** Mortality relative risk caused by heat from 2007 to 2015.

**Table S1.** Estimated effects of heat (95% confidence interval) on cause-specific mortality during 2007 to 2015 in 3 cities.

| Cause of death             | Nanjing         | Suzhou          | Yancheng        |
|----------------------------|-----------------|-----------------|-----------------|
|                            | RR              | RR              | RR              |
| Non-accidental             | 1.10(1.04,1.15) | 1.15(1.08,1.22) | 1.27(1.18,1.36) |
| Cardiorespiratory diseases | 1.19(1.12,1.26) | 1.28(1.21,1.35) | 1.36(1.25,1.49) |
| Hypertensive diseases      | 1.54(1.16,2.03) | 1.33(1.16,1.53) | 2.07(1.27,3.37) |
| IHD                        | 1.21(1.09,1.34) | 1.06(0.93,1.20) | 1.27(1.08,1.50) |
| Stroke                     | 1.20(1.11,1.29) | 1.40(1.26,1.56) | 1.36(1.21,1.53) |
| COPD                       | 1.26(1.03,1.55) | 1.30(1.09,1.55) | 1.35(1.16,1.56) |

IHD: ischemic heart diseases, COPD: chronic obstructive pulmonary disease

**Table S2.** Estimated effects of heat (95% confidence interval) on cardiorespiratory mortality during 2007 to 2015 in different sexes and age-groups in 3 cities.

| sex, age   | Nanjing         | Suzhou          | Yancheng        |
|------------|-----------------|-----------------|-----------------|
|            | RR              | RR              | RR              |
| <b>All</b> |                 |                 |                 |
| All ages   | 1.19(1.12,1.26) | 1.28(1.21,1.35) | 1.36(1.25,1.49) |
| 15-64      | 1.01(0.93,1.09) | 1.10(0.95,1.27) | 1.32(1.07,1.61) |
| 65-74      | 1.20(1.02,1.42) | 1.50(1.24,1.82) | 1.22(1.09,1.36) |
| ≥75        | 1.24(1.16,1.32) | 1.29(1.21,1.36) | 1.42(1.28,1.58) |
| <b>Men</b> |                 |                 |                 |
| All ages   | 1.09(1.02,1.17) | 1.23(1.11,1.35) | 1.24(1.11,1.38) |
| 15-64      | 1.01(0.89,1.13) | 1.18(0.87,1.59) | 1.37(1.06,1.77) |



|              |                 |                 |                 |
|--------------|-----------------|-----------------|-----------------|
| 65-74        | 1.15(0.95,1.40) | 1.34(1.04,1.68) | 1.22(1.06,1.41) |
| ≥75          | 1.12(1.03,1.21) | 1.22(1.09,1.36) | 1.27(1.11,1.44) |
| <b>Women</b> |                 |                 |                 |
| All ages     | 1.34(1.20,1.50) | 1.35(1.27,1.45) | 1.50(1.33,1.68) |
| 15-64        | 1.02(0.90,1.14) | 1.11(0.89,1.39) | 1.21(0.87,1.70) |
| 65-74        | 1.32(1.01,1.74) | 1.91(1.36,2.68) | 1.25(0.99,1.59) |
| ≥75          | 1.43(1.27,1.62) | 1.37(1.27,1.46) | 1.59(1.40,1.81) |

**Table S3.** The minimum mortality temperature (MMT) stratified by cause of death.

| Cause of death        | Nanjing          | Suzhou           | Yancheng         |
|-----------------------|------------------|------------------|------------------|
|                       | Temperature (°C) | Temperature (°C) | Temperature (°C) |
| Non-accidental        | 30.64            | 30.56            | 14.41            |
| Cardiorespiratory     | 29.88            | 29.87            | 13.61            |
| diseases              |                  |                  |                  |
| Hypertensive diseases | 25.76            | 31.39            | 10.33            |
| IHD                   | 30.2             | 31.56            | 14.89            |
| Stroke                | 30.91            | 22.62            | 13.9             |
| COPD                  | 19.55            | 19.13            | 13.17            |

IHD: ischemic heart diseases, COPD: chronic obstructive pulmonary disease

**Table S4.** The minimum mortality temperature (MMT) of cardiorespiratory diseases stratified by sex and age.

| sex, age     | Nanjing          | Suzhou           | Yancheng         |
|--------------|------------------|------------------|------------------|
|              | Temperature (°C) | Temperature (°C) | Temperature (°C) |
| <b>All</b>   |                  |                  |                  |
| All ages     | 29.88            | 29.87            | 13.61            |
| 15-64        | 35.29            | 31.74            | 11.31            |
| 65-74        | 20.7             | 17.76            | 29.95            |
| ≥75          | 29.75            | 30.41            | 13.98            |
| <b>Men</b>   |                  |                  |                  |
| All ages     | 31.38            | 23.34            | 15.37            |
| 15-64        | 33.08            | 15.88            | 11.21            |
| 65-74        | 23.73            | 21.02            | 30.38            |
| ≥75          | 31.76            | 24.97            | 18.54            |
| <b>Women</b> |                  |                  |                  |
| All ages     | 19.45            | 30.75            | 12.39            |
| 15-64        | 34.39            | 32.84            | 11.52            |
| 65-74        | 15.71            | 13.45            | 16.04            |
| ≥75          | 18.92            | 30.98            | 12.07            |

**Table S5.** Sensitivity analysis for the RR of cause-specific mortality caused by extreme heat in three cities.

| Adjustment<br>to model | Nanjing | Suzhou | Yancheng |
|------------------------|---------|--------|----------|
|------------------------|---------|--------|----------|

|                   |             |   |                 |                 |                 |
|-------------------|-------------|---|-----------------|-----------------|-----------------|
| Non-accidental    | Main model  |   | 1.10(1.04,1.15) | 1.15(1.08,1.22) | 1.27(1.18,1.36) |
|                   | Time:       | 4 | 1.15(1.08,1.21) | 1.20(1.15,1.25) | 1.34(1.26,1.42) |
|                   | df/year     |   |                 |                 |                 |
|                   | Time:       | 6 | 1.11(1.06,1.17) | 1.17(1.13,1.22) | 1.26(1.18,1.35) |
|                   | df/year     |   |                 |                 |                 |
|                   | Lag: 4 days |   | 1.12(1.06,1.19) | 1.21(1.14,1.29) | 1.29(1.21,1.38) |
|                   | Lag: 8 days |   | 1.08(1.03,1.14) | 1.16(1.12,1.21) | 1.25(1.17,1.35) |
| Cardiorespiratory | Main model  |   | 1.19(1.12,1.26) | 1.28(1.21,1.35) | 1.36(1.25,1.49) |
|                   | Time:       | 4 | 1.24(1.17,1.31) | 1.36(1.27,1.44) | 1.51(1.40,1.62) |
|                   | df/year     |   |                 |                 |                 |
|                   | Time:       | 6 | 1.21(1.14,1.28) | 1.27(1.21,1.34) | 1.34(1.23,1.47) |
|                   | df/year     |   |                 |                 |                 |
|                   | Lag: 4 days |   | 1.22(1.13,1.33) | 1.35(1.24,1.46) | 1.39(1.28,1.51) |
|                   | Lag: 8 days |   | 1.17(1.10,1.24) | 1.26(1.19,1.33) | 1.36(1.24,1.49) |
| Hypertensive      | Main model  |   | 1.54(1.16,2.03) | 1.33(1.16,1.53) | 2.07(1.27,3.37) |
|                   | Time:       | 4 | 1.74(1.36,2.23) | 1.40(1.23,1.60) | 1.78(1.16,2.75) |
|                   | df/year     |   |                 |                 |                 |
|                   | Time:       | 6 | 1.52(1.15,2.00) | 1.33(1.17,1.52) | 2.09(1.27,3.45) |
|                   | df/year     |   |                 |                 |                 |
|                   | Lag: 4 days |   | 1.60(1.22,2.09) | 1.40(1.09,1.78) | 2.07(1.33,3.22) |
|                   | Lag: 8 days |   | 1.46(1.10,1.94) | 1.33(1.15,1.54) | 1.98(1.17,3.34) |
| Ischaemic heart   | Main model  |   | 1.21(1.09,1.34) | 1.06(0.93,1.2)  | 1.27(1.08,1.50) |
|                   | Time:       | 4 | 1.27(1.13,1.42) | 1.15(0.99,1.33) | 1.44(1.25,1.64) |
|                   | df/year     |   |                 |                 |                 |
|                   | Time:       | 6 | 1.23(1.11,1.37) | 1.07(0.95,1.20) | 1.25(1.12,1.40) |
|                   | df/year     |   |                 |                 |                 |
| Ischaemic heart   | Lag: 4 days |   | 1.20(1.09,1.32) | 1.09(0.96,1.24) | 1.30(1.11,1.51) |
|                   | Lag: 8 days |   | 1.18(1.07,1.31) | 1.01(0.88,1.17) | 1.26(1.06,1.51) |
|                   |             |   |                 |                 |                 |
| Stroke            | Main model  |   | 1.2(1.11,1.29)  | 1.40(1.26,1.56) | 1.36(1.21,1.53) |

|                                                |             |   |                 |                 |                 |
|------------------------------------------------|-------------|---|-----------------|-----------------|-----------------|
| Chronic<br>obstructive<br>pulmonary<br>disease | Time:       | 4 | 1.22(1.13,1.31) | 1.33(1.22,1.45) | 1.37(1.24,1.51) |
|                                                | df/year     |   |                 |                 |                 |
|                                                | Time:       | 6 | 1.22(1.13,1.31) | 1.38(1.26,1.51) | 1.34(1.19,1.51) |
|                                                | df/year     |   |                 |                 |                 |
|                                                | Lag: 4 days |   | 1.21(1.13,1.30) | 1.49(1.33,1.65) | 1.40(1.26,1.56) |
|                                                | Lag: 8 days |   | 1.18(1.10,1.28) | 1.40(1.27,1.54) | 1.37(1.21,1.54) |
|                                                | Main model  |   | 1.26(1.03,1.55) | 1.30(1.09,1.55) | 1.35(1.16,1.56) |
|                                                | Time:       | 4 | 1.52(1.28,1.80) | 1.61(1.40,1.86) | 1.73(1.53,1.95) |
|                                                | df/year     |   |                 |                 |                 |
|                                                | Time:       | 6 | 1.28(1.05,1.56) | 1.22(1.05,1.42) | 1.33(1.15,1.54) |
|                                                | df/year     |   |                 |                 |                 |
|                                                | Lag: 4 days |   | 1.36(1.12,1.65) | 1.37(1.15,1.63) | 1.37(1.19,1.57) |
|                                                | Lag: 8 days |   | 1.24(1.01,1.51) | 1.24(1.03,1.49) | 1.36(1.16,1.58) |

**Table S6.** Sensitivity analysis for the RR of cardiorespiratory mortality in different sexes and age-groups caused by extreme heat in three cities.

| Adjustment to |                 | Nanjing         | Suzhou          | Yancheng        |
|---------------|-----------------|-----------------|-----------------|-----------------|
| model         |                 |                 |                 |                 |
| <b>All</b>    |                 |                 |                 |                 |
| All ages      | Main model      | 1.19(1.12,1.26) | 1.28(1.21,1.35) | 1.36(1.25,1.49) |
|               | Time:4 df/year  | 1.24(1.17,1.31) | 1.36(1.27,1.44) | 1.51(1.40,1.62) |
|               | Time: 6 df/year | 1.21(1.14,1.28) | 1.27(1.21,1.34) | 1.34(1.23,1.47) |
|               | Lag: 4 days     | 1.22(1.13,1.33) | 1.35(1.24,1.46) | 1.39(1.28,1.51) |
|               | Lag: 8 days     | 1.17(1.10,1.24) | 1.26(1.19,1.33) | 1.36(1.24,1.49) |
| 15-64         | Main model      | 1.01(0.93,1.09) | 1.10(0.95,1.27) | 1.32(1.07,1.61) |
|               | Time: 4 df/year | 1.03(0.93,1.15) | 1.17(0.95,1.43) | 1.35(1.13,1.61) |
|               | Time: 6 df/year | 1.01(0.93,1.09) | 1.12(0.98,1.28) | 1.28(1.04,1.57) |
|               | Lag: 4 days     | 1.00(0.96,1.04) | 1.11(0.97,1.27) | 1.30(1.08,1.57) |

|            |                 |                 |                 |                 |
|------------|-----------------|-----------------|-----------------|-----------------|
| 65-74      | Lag: 8 days     | 1.00(0.98,1.02) | 1.11(0.95,1.29) | 1.37(1.10,1.71) |
|            | Main model      | 1.20(1.02,1.42) | 1.50(1.24,1.82) | 1.22(1.09,1.36) |
|            | Time: 4 df/year | 1.34(1.17,1.55) | 1.45(1.23,1.70) | 1.29(1.14,1.46) |
|            | Time: 6 df/year | 1.22(1.04,1.44) | 1.43(1.18,1.73) | 1.24(1.11,1.38) |
|            | Lag: 4 days     | 1.25(1.07,1.46) | 1.56(1.30,1.87) | 1.24(1.11,1.38) |
| ≥75        | Lag: 8 days     | 1.13(0.96,1.32) | 1.50(1.22,1.84) | 1.20(1.07,1.35) |
|            | Main model      | 1.24(1.16,1.32) | 1.29(1.21,1.36) | 1.42(1.28,1.58) |
|            | Time: 4 df/year | 1.34(1.24,1.45) | 1.36(1.28,1.45) | 1.61(1.48,1.75) |
|            | Time: 6 df/year | 1.26(1.17,1.35) | 1.29(1.22,1.36) | 1.40(1.26,1.55) |
|            | Lag: 4 days     | 1.28(1.17,1.40) | 1.34(1.22,1.46) | 1.46(1.33,1.60) |
| <b>Men</b> | Lag: 8 days     | 1.22(1.14,1.30) | 1.27(1.19,1.35) | 1.42(1.27,1.58) |
|            | Main model      |                 |                 |                 |
|            | Time: 4 df/year | 1.09(1.02,1.17) | 1.23(1.11,1.35) | 1.24(1.11,1.38) |
|            | Time: 6 df/year | 1.18(1.08,1.27) | 1.31(1.21,1.42) | 1.39(1.27,1.52) |
|            | Lag: 4 days     | 1.11(1.04,1.20) | 1.20(1.12,1.29) | 1.24(1.15,1.34) |
| All ages   | Lag: 8 days     | 1.11(1.03,1.20) | 1.25(1.13,1.38) | 1.27(1.15,1.47) |
|            | Main model      | 1.08(1.00,1.16) | 1.21(1.09,1.33) | 1.25(1.11,1.40) |
|            | Time: 4 df/year | 1.01(0.89,1.13) | 1.18(0.87,1.59) | 1.37(1.06,1.77) |
|            | Time: 6 df/year | 1.03(0.89,1.19) | 1.25(0.96,1.63) | 1.42(1.14,1.78) |
|            | Lag: 4 days     | 1.01(0.90,1.14) | 1.17(0.88,1.57) | 1.35(1.04,1.74) |
| 15-64      | Lag: 8 days     | 1.01(0.90,1.14) | 1.15(0.88,1.51) | 1.35(1.07,1.71) |
|            | Main model      | 1.03(0.76,1.41) | 1.15,0.84,1.57) | 1.38(1.05,1.82) |
|            | Time: 4 df/year | 1.15(0.95,1.40) | 1.34(1.04,1.68) | 1.22(1.06,1.41) |
|            | Time: 6 df/year | 1.28(1.08,1.53) | 1.31(1.09,1.58) | 1.25(1.08,1.44) |
|            | Lag: 4 days     | 1.19(0.98,1.45) | 1.24(1.01,1.53) | 1.24(1.08,1.42) |
| 65-74      | Lag: 8 days     | 1.20(1.00,1.44) | 1.40(1.12,1.74) | 1.23(1.07,1.40) |
|            | Main model      | 1.16(0.95,1.41) | 1.38(1.08,1.76) | 1.20(1.03,1.39) |
|            | Time: 4 df/year | 1.12(1.03,1.21) | 1.22(1.09,1.36) | 1.27(1.11,1.44) |
|            | Time: 6 df/year | 1.20(1.09,1.31) | 1.27(1.19,1.37) | 1.47(1.32,1.63) |
|            |                 |                 |                 |                 |



|          |                 |                 |                 |                 |
|----------|-----------------|-----------------|-----------------|-----------------|
|          | Lag: 4 days     | 1.14(1.03,1.24) | 1.20(1.11,1.30) | 1.26(1.14,1.38) |
|          | Lag: 8 days     | 1.13(1.05,1.23) | 1.24(1.11,1.39) | 1.31(1.16,1.48) |
|          | Main model      | 1.10(1.02,1.20) | 1.19(1.07,1.32) | 1.29(1.13,1.48) |
| Women    | Time: 4 df/year |                 |                 |                 |
| All ages | Time: 6 df/year | 1.34(1.2,1.5)   | 1.35(1.27,1.45) | 1.50(1.33,1.68) |
|          | Lag: 4 days     | 1.43(1.30,1.57) | 1.40(1.31,1.50) | 1.64(1.49,1.80) |
|          | Lag: 8 days     | 1.35(1.21,1.50) | 1.35(1.27,1.44) | 1.46(1.30,1.64) |
|          | Main model      | 1.40(1.26,1.56) | 1.45(1.31,1.62) | 1.52(1.36,1.69) |
|          | Time: 4 df/year | 1.27(1.17,1.37) | 1.34(1.24,1.43) | 1.48(1.31,1.67) |
| 15-64    | Time: 6 df/year | 1.02(0.9,1.14)  | 1.11(0.89,1.39) | 1.21(0.87,1.70) |
|          | Lag: 4 days     | 1.08(0.91,1.28) | 1.13(0.90,1.42) | 1.22(0.93,1.61) |
|          | Lag: 8 days     | 1.04(0.89,1.21) | 1.11(0.91,1.37) | 1.17(0.83,1.65) |
|          | Main model      | 1.00(0.98,1.02) | 1.14(0.91,1.41) | 1.22(0.89,1.66) |
|          | Time: 4 df/year | 1.04(0.89,1.21) | 1.06(0.84,1.34) | 1.37(0.97,1.92) |
| 65-74    | Time: 6 df/year | 1.32(1.01,1.74) | 1.91(1.36,2.68) | 1.25(0.99,1.59) |
|          | Lag: 4 days     | 1.46(1.16,1.83) | 1.79(1.32,2.42) | 1.39(1.15,1.67) |
|          | Lag: 8 days     | 1.31(0.99,1.73) | 1.90(1.35,2.67) | 1.23(1.05,1.45) |
|          | Main model      | 1.38(1.07,1.79) | 1.91(1.39,2.62) | 1.27(1.01,1.59) |
|          | Time: 4 df/year | 1.09(0.83,1.44) | 1.78(1.24,2.56) | 1.24(0.96,1.60) |
| ≥75      | Time: 6 df/year | 1.43(1.27,1.62) | 1.37(1.27,1.46) | 1.59(1.4,1.81)  |
|          | Lag: 4 days     | 1.49(1.35,1.65) | 1.41(1.32,1.51) | 1.76(1.58,1.96) |
|          | Lag: 8 days     | 1.44(1.27,1.62) | 1.37(1.28,1.46) | 1.57(1.38,1.79) |
|          | Main model      | 1.50(1.34,1.69) | 1.44(1.28,1.61) | 1.62(1.43,1.82) |
|          | Time: 4 df/year | 1.36(1.20,1.53) | 1.34(1.25,1.45) | 1.55(1.35,1.78) |

---

**Table S7.** Ecosystem services values of Jiangsu Province, Nanjing, Suzhou and Yancheng.

|                  |      | WY      | CS                  | NDVI  | COHESION | SHDI  |
|------------------|------|---------|---------------------|-------|----------|-------|
|                  |      | (mm)    | (g/m <sup>2</sup> ) |       | (%)      |       |
| Jiangsu Province | 2000 | 308.717 | 743.932             | 0.706 | 99.623   | 1.059 |
|                  | 2005 | 325.94  | 739.856             | 0.730 | 99.618   | 1.071 |
|                  | 2010 | 323.344 | 798.863             | 0.747 | 99.617   | 1.101 |
|                  | 2015 | 393.316 | 851.185             | 0.683 | 99.608   | 1.136 |
| Nanjing          | 2000 | 314.823 | 674.331             | 0.677 | 98.086   | 1.406 |
|                  | 2005 | 370.865 | 683.621             | 0.711 | 98.077   | 1.412 |
|                  | 2010 | 463.930 | 731.055             | 0.715 | 98.144   | 1.414 |
|                  | 2015 | 596.389 | 810.272             | 0.618 | 98.201   | 1.424 |
| Suzhou           | 2000 | 342.839 | 764.469             | 0.576 | 98.799   | 1.459 |
|                  | 2005 | 223.798 | 659.171             | 0.530 | 98.769   | 1.471 |
|                  | 2010 | 338.285 | 647.436             | 0.565 | 98.703   | 1.497 |
|                  | 2015 | 482.903 | 733.011             | 0.455 | 98.464   | 1.500 |
| Yancheng         | 2000 | 353.622 | 845.644             | 0.748 | 99.500   | 0.805 |
|                  | 2005 | 373.877 | 832.114             | 0.787 | 99.494   | 0.815 |
|                  | 2010 | 339.413 | 922.905             | 0.806 | 99.486   | 0.839 |
|                  | 2015 | 351.647 | 966.752             | 0.756 | 99.481   | 0.868 |

**Table S8.** Correlation between ESs and HWMI.

|      | WY       | CS        | NDVI     | COHESION  | SHDI     |
|------|----------|-----------|----------|-----------|----------|
| HWMI | -0.393 * | -0.658 ** | -0.394 * | -0.526 ** | 0.599 ** |

\* p<0.05; \*\* p<0.01

**Table S9.** Correlation between ESs and cause-specific mortality risk associated with heat.

|                       | WY        | CS       | NDVI     | COHESION | SHDI      |
|-----------------------|-----------|----------|----------|----------|-----------|
| Non-accidental        | -0.576 ** | 0.400 *  | 0.346    | 0.711 ** | -0.577 ** |
| Cardiorespiratory     | -0.613 ** | 0.206    | 0.216    | 0.506 ** | -0.372    |
| Hypertensive diseases | -0.393 *  | 0.684 ** | 0.786 ** | 0.641 ** | -0.783 ** |
| IHD                   | -0.246    | 0.556 ** | 0.787 ** | 0.308    | -0.582 ** |
| Stroke                | -0.596 ** | -0.141   | -0.173   | 0.271    | -0.020    |
| COPD                  | -0.602 ** | 0.118    | 0.211    | 0.339    | -0.260    |

\* p<0.05; \*\* p<0.01

**Table S10.** Correlation between ESs and cardiorespiratory mortality risk in different groups associated with heat.

|              | WY       | CS       | NDVI     | COHESION | SHDI     |
|--------------|----------|----------|----------|----------|----------|
| <b>All</b>   |          |          |          |          |          |
| All ages     | -0.613** | 0.206    | 0.216    | 0.506**  | -0.372   |
| 15-64        | -0.412*  | 0.676**  | 0.531**  | 0.932**  | -0.836** |
| 65-74        | -0.379   | -0.598** | -0.698** | -0.119   | 0.488**  |
| ≥75          | -0.596** | 0.281    | 0.342    | 0.493**  | -0.433*  |
| <b>Men</b>   |          |          |          |          |          |
| All ages     | -0.600** | 0.089    | -0.006   | 0.530**  | -0.271   |
| 15-64        | -0.427*  | 0.596**  | 0.409*   | 0.924**  | -0.765** |
| 65-74        | -0.498** | -0.374   | -0.452*  | 0.105    | 0.228    |
| ≥75          | -0.617** | 0.207    | 0.172    | 0.559**  | -0.382*  |
| <b>Women</b> |          |          |          |          |          |
| All ages     | -0.576** | 0.187    | 0.305    | 0.345    | -0.321   |
| 15-64        | -0.533** | 0.447*   | 0.321    | 0.792**  | -0.625** |

|       |          |          |          |        |         |
|-------|----------|----------|----------|--------|---------|
| 65-74 | -0.276   | -0.705** | -0.823** | -0.246 | 0.622** |
| ≥75   | -0.525** | 0.291    | 0.459*   | 0.336  | -0.401* |

\* p<0.05; \*\* p<0.01

**Table S11.** Results of paths and effects for different cause-special mortality risk.

| X=>M=>Y  |      |                   | Effect of X on<br>M | Direct effect of<br>M on Y |
|----------|------|-------------------|---------------------|----------------------------|
| X        | M    | Y                 | a                   | b                          |
| WY       |      | Stroke            | -0.393*             | 0.378*                     |
|          |      | COPD              | -0.393*             | 0.342*                     |
|          |      | Non-accidental    | -0.658**            | 0.681**                    |
|          |      | Cardiorespiratory | -0.658**            | 0.889**                    |
|          |      | Hypertensive      |                     |                            |
| CS       |      | diseases          | -0.658**            | 0.722**                    |
|          |      | IHD               | -0.658**            | 0.805**                    |
|          |      | Stroke            | -0.658**            | 0.812**                    |
|          |      | COPD              | -0.658**            | 1.064**                    |
|          |      | Cardiorespiratory | -0.394*             | 0.537**                    |
| NDVI     | HWMI | Hypertensive      |                     |                            |
|          |      | diseases          | -0.394*             | 0.317*                     |
|          |      | IHD               | -0.394*             | 0.474**                    |
|          |      | Stroke            | -0.394*             | 0.575**                    |
|          |      | COPD              | -0.394*             | 0.720**                    |
| COHESION |      | Non-accidental    | -0.526**            | 0.688**                    |
|          |      | Cardiorespiratory | -0.526**            | 0.878*                     |
|          |      | Hypertensive      |                     |                            |
|          |      | diseases          | -0.526**            | 0.410**                    |
|          |      | Stroke            | -0.526**            | 0.963**                    |

|      |                   |          |         |
|------|-------------------|----------|---------|
|      | COPD              | -0.526** | 0.974** |
|      | Nonaccidental     | 0.599**  | 0.730** |
|      | Cardiorespiratory | 0.599**  | 0.922** |
|      | Hypertensive      |          |         |
| SHDI | diseases          | 0.599**  | 0.667** |
|      | IHD               | 0.599**  | 0.684** |
|      | Stroke            | 0.599**  | 0.882** |
|      | COPD              | 0.599**  | 1.062** |

\* p<0.05\*\* p<0.01

**Table S12.** Results of paths and effects for different sexes and age-groups mortality risk.

| X=>M=>Y |      |             | Effect of X on M | Direct effect of<br>M on Y |
|---------|------|-------------|------------------|----------------------------|
| X       | M    | Y           | a                | b                          |
| WY      |      | 65-74       | -0.393*          | 0.541**                    |
|         |      | 65-74-men   | -0.393*          | 0.436*                     |
|         |      | 65-74-women | -0.393*          | 0.561**                    |
|         |      | Men         | -0.658**         | 0.668**                    |
|         |      | Women       | -0.658**         | 1.048**                    |
|         |      | ≥75         | -0.658**         | 0.967**                    |
| CS      | HWMI | 15-64-women | -0.658**         | 0.486*                     |
|         |      | 65-74-men   | -0.658**         | 0.561*                     |
|         |      | ≥75-men     | -0.658**         | 0.821**                    |
|         |      | ≥75-women   | -0.658**         | 1.075**                    |
|         |      | Women       | -0.394*          | 0.699**                    |
| NDVI    |      | 65-74       | -0.394*          | 0.392**                    |
|         |      | ≥75         | -0.394*          | 0.589**                    |



|          |             |          |         |
|----------|-------------|----------|---------|
| COHESION | 65-74-men   | -0.394*  | 0.457*  |
|          | 65-74-women | -0.394*  | 0.306*  |
|          | ≥75-men     | -0.394*  | 0.469*  |
|          | ≥75-women   | -0.394*  | 0.709** |
|          | Men         | -0.526** | 0.829** |
|          | Women       | -0.526** | 0.903** |
|          | 15-64       | -0.526** | 0.247** |
|          | 65-74       | -0.526** | 0.752** |
|          | ≥75         | -0.526** | 0.862** |
|          | 15-64-men   | -0.526** | 0.278** |
|          | 15-64-women | -0.526** | 0.551** |
|          | 65-74-men   | -0.526** | 0.856** |
|          | 65-74-women | -0.526** | 0.627** |
|          | ≥75-men     | -0.526** | 0.861** |
|          | ≥75-women   | -0.526** | 0.823** |
| SHDI     | Men         | 0.599**  | 0.752** |
|          | Women       | 0.599**  | 1.033** |
|          | 15-64       | 0.599**  | 0.295*  |
|          | 65-74       | 0.599**  | 0.490*  |
|          | ≥75         | 0.599**  | 0.970** |
|          | 15-64-women | 0.599**  | 0.554** |
|          | 65-74-men   | 0.599**  | 0.666** |
|          | ≥75-men     | 0.599**  | 0.869** |
|          | ≥75-women   | 0.599**  | 1.027** |

---

\* p<0.05\*\* p<0.01

**Table S13.** Results of Granger causality test between ESs and HWMI.

| Null hypothesis (H <sub>0</sub> )                                 | F-value | p-value |
|-------------------------------------------------------------------|---------|---------|
| Biodiversity is not the Granger causality of HWMI                 | 4.57    | 0.043*  |
| Cultural service is not the Granger causality of HWMI             | 9.187   | 0.006** |
| Water supply service is not the Granger causality of HWMI         | 0.347   | 0.562   |
| Carbon sequestration service is not the Granger causality of HWMI | 9.371   | 0.006** |
| Cooling service is not the Granger causality of HWMI              | 6.199   | 0.020*  |

\* p<0.05; \*\* p<0.01
